# Supplementary material for: The effect of crystallite size on low-temperature hydrothermal stability of Cu-SAPO-34
Source: Royal Society of Chemistry journal article supplement (doi:10.1039/d0cy00414f), 2020-01-01
Supplement: d0cy00414f1.pdf [file d0cy00414f1.pdf]

# **The effect of crystallite size on low-temperature hydrothermal stability of Cu-SAPO-34**

*Jinpeng Du<sup>a,c</sup>, Xiaoyan Shi<sup>a,c\*</sup>, Yulong Shan<sup>a,c</sup>, Yingjie Wang<sup>a,c</sup>, Wenshuo Zhang<sup>a,c</sup>,  
Yunbo Yu<sup>a,b,c</sup>, Wenpo Shan<sup>b\*</sup>, Hong He<sup>a,b,c</sup>*

<sup>a</sup> State Key Joint Laboratory of Environment Simulation and Pollution Control,  
Research Center for Eco-Environmental Sciences, Chinese Academy of Sciences,  
Beijing 100085, China.

<sup>b</sup> Center for Excellence in Regional Atmospheric Environment, Institute of Urban  
Environment, Chinese Academy of Sciences, Xiamen 361021, China.

<sup>c</sup> University of Chinese Academy of Sciences, Beijing 100049, China.

Includes 8 pages, 5 figures, 3 tables.

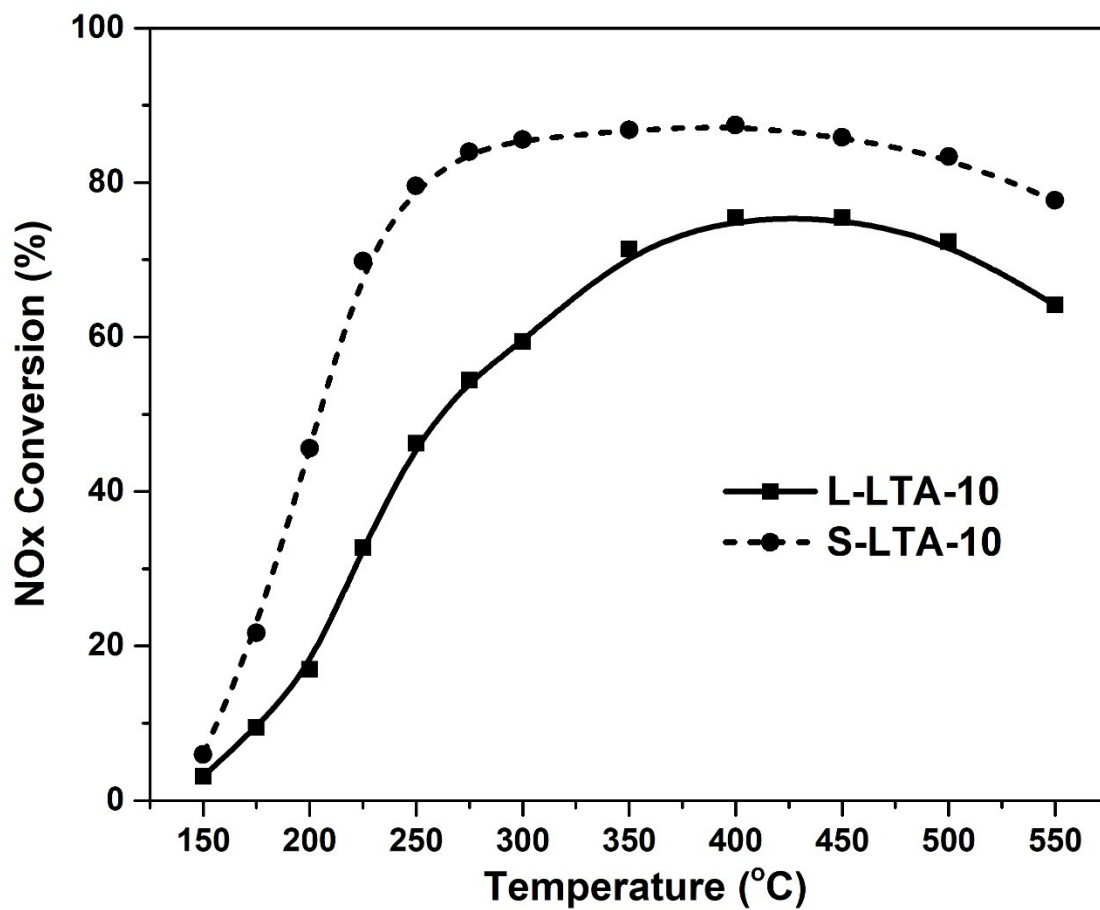

Figure S1. NH<sub>3</sub>-SCR activities of Cu-SAPO-34 with large and small particle sizes after low-temperature hydrothermal treatment for 10 h.

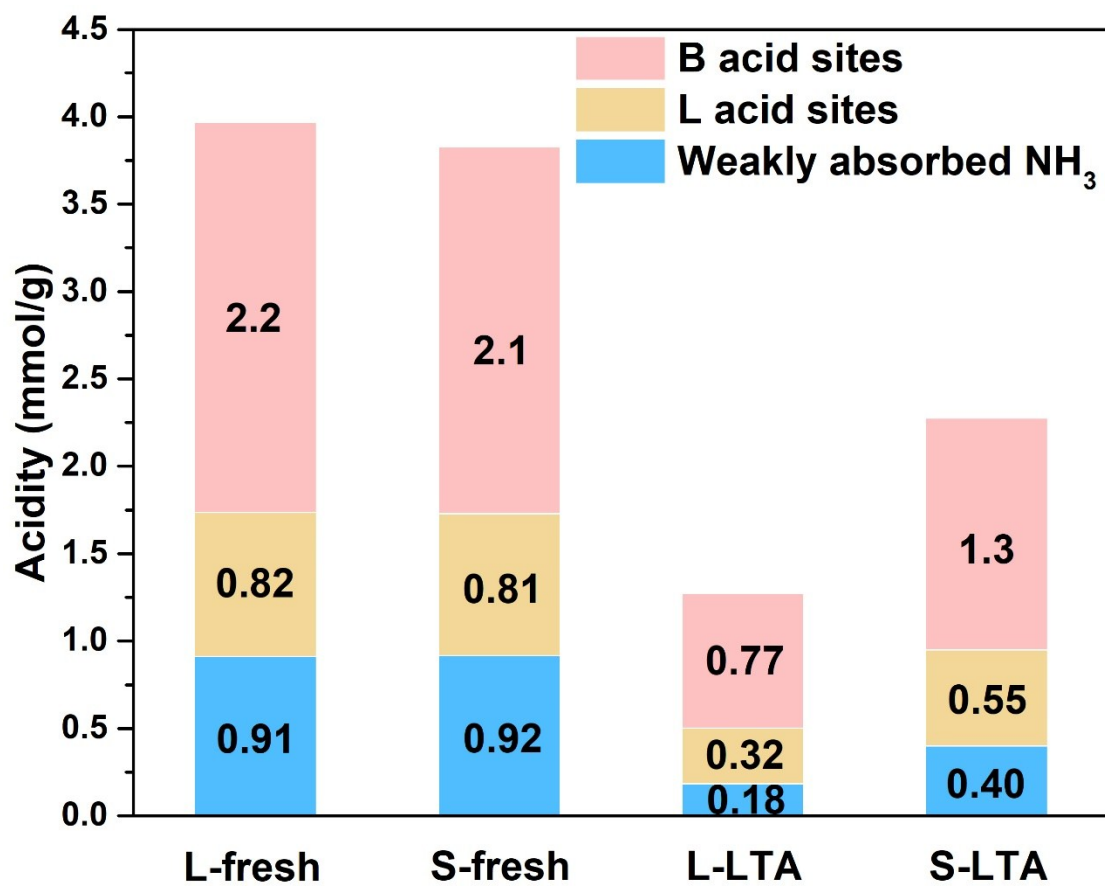

Figure S2. Integrated NH<sub>3</sub> desorption amounts from NH<sub>3</sub>-TPD results.

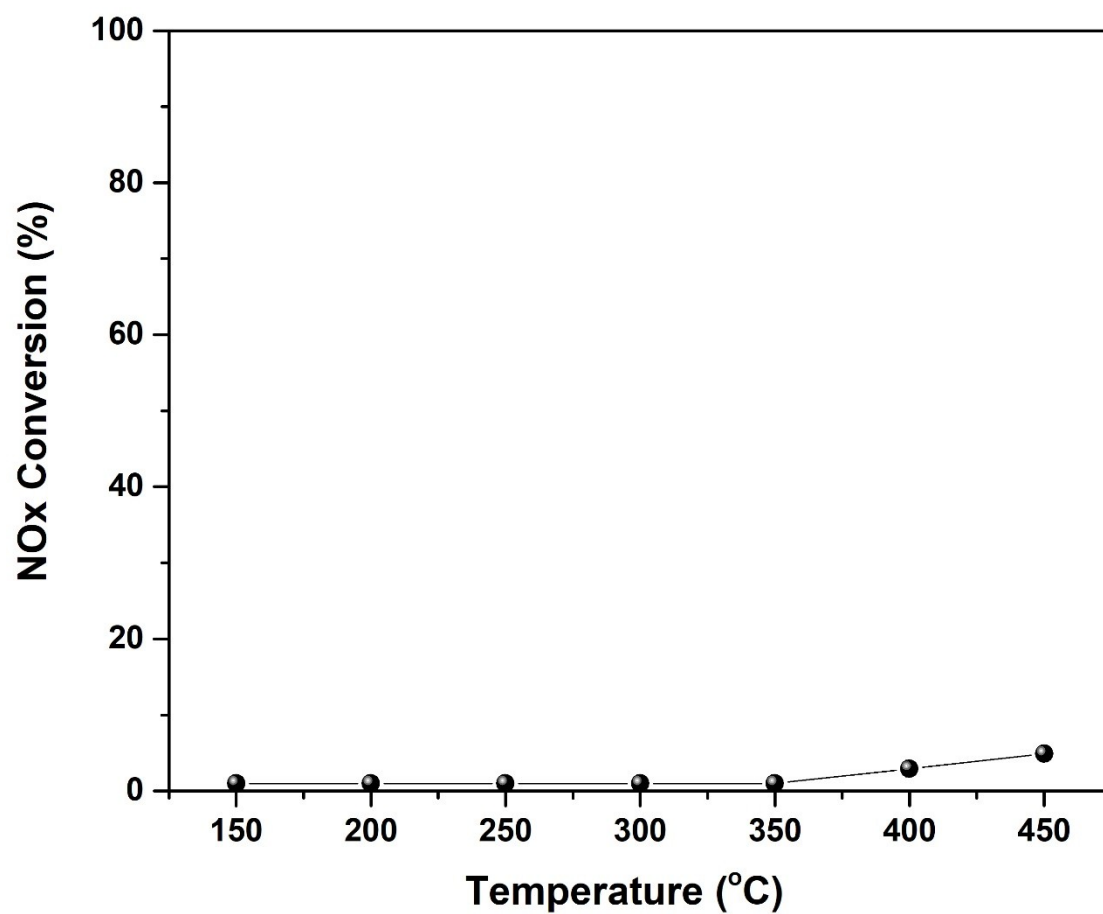

Figure S3. NH<sub>3</sub>-SCR activity of CuAl<sub>2</sub>O<sub>4</sub> (obtained by calcinating the mixture of CuO and Al<sub>2</sub>O<sub>3</sub> at 1000 °C for 2h).

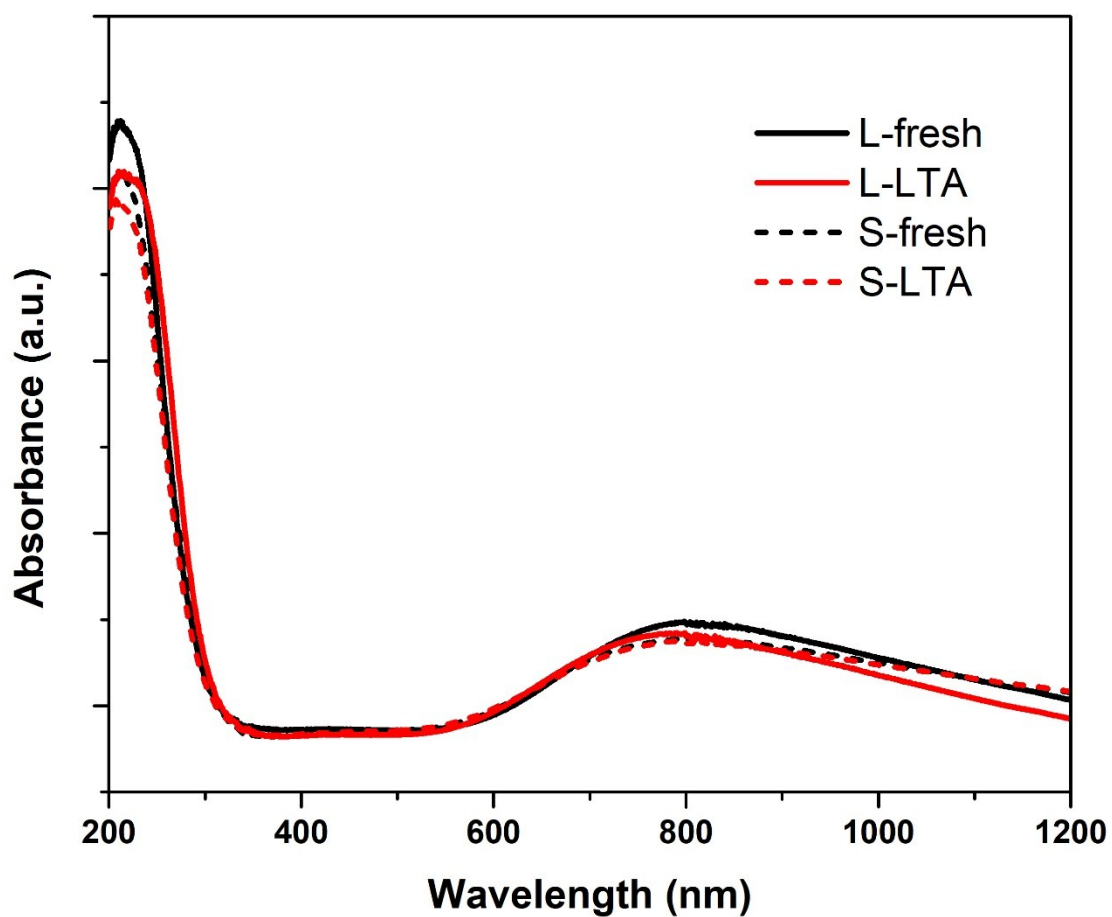

Figure S4. UV-vis spectra of fresh and hydrothermally aged catalysts.

Ultraviolet visible diffuse reflectance spectroscopy (UV-vis-DRS) was carried out on a Varian Cary 5000 spectrometer at room temperature with scanning range from 200 nm to 1200 nm.

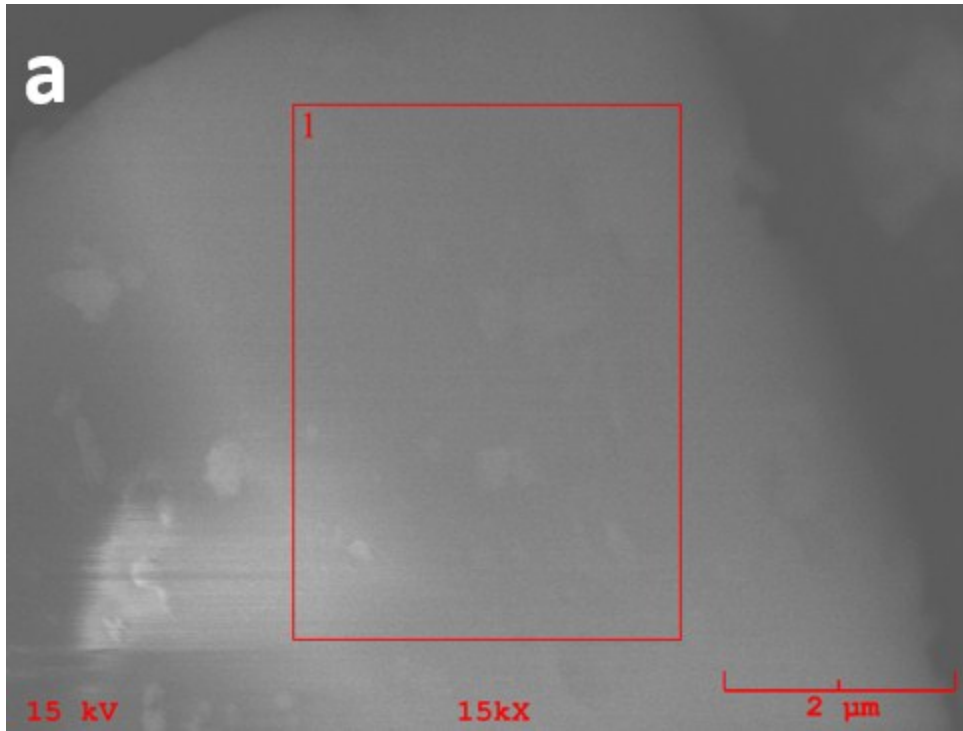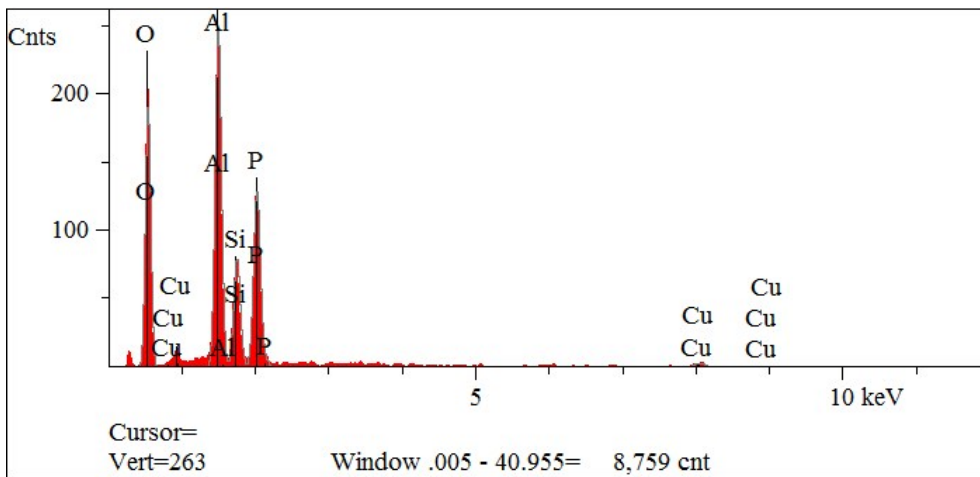

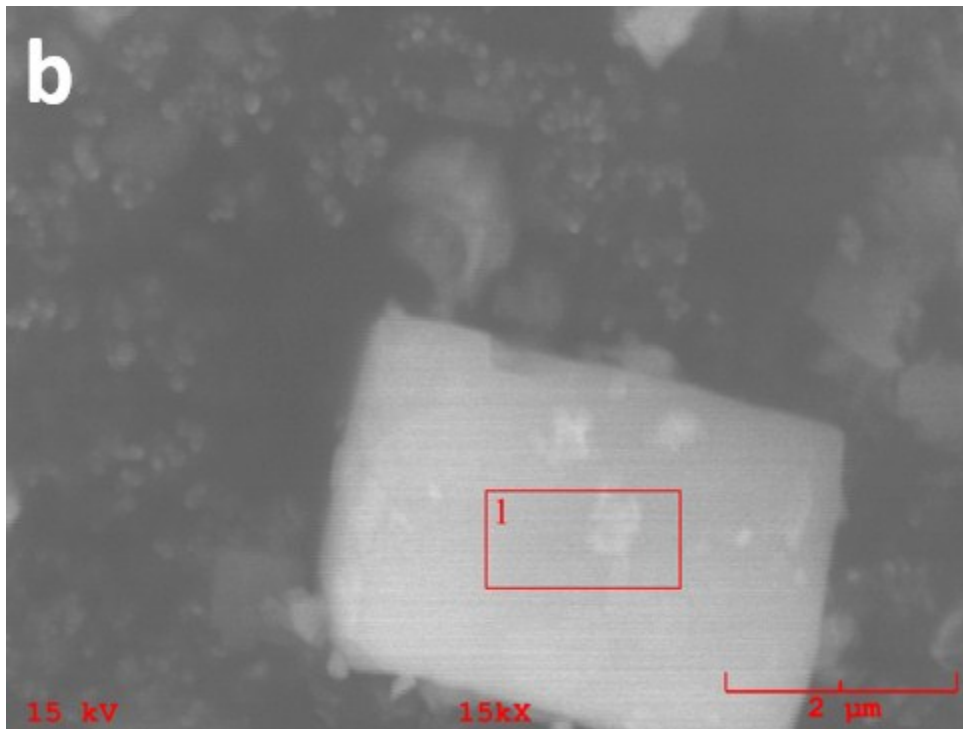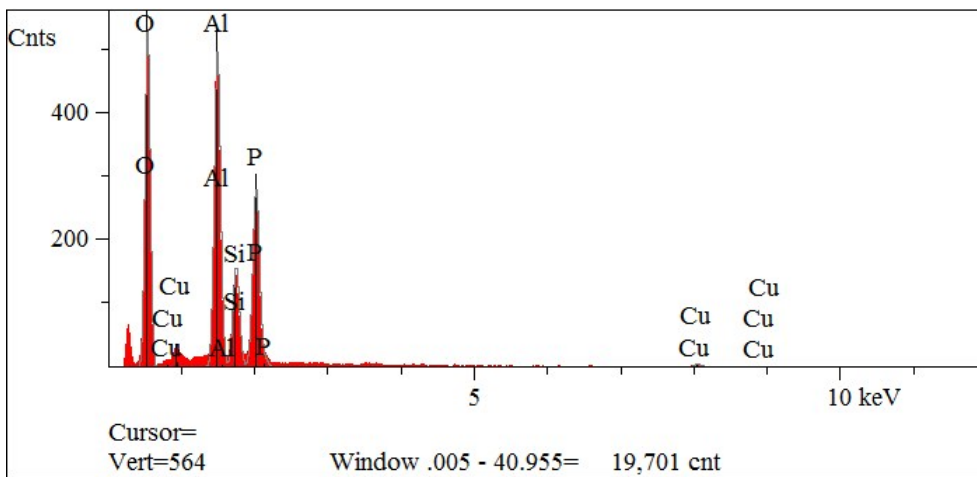

Figure S5. SEM-EDS images of (a) L-fresh (b) S-fresh.

Table S1. Deconvoluted peaks of  $^{29}\text{Si}$  NMR results of Cu-SAPO-34 with large and small particle sizes for fresh and LTA catalysts.

|         | Si(4Al)/% | Si(3Al)/% | Si(2Al)/% | Si(1Al)/% | Si(0Al)/% |
|---------|-----------|-----------|-----------|-----------|-----------|
| L-fresh | 75.0      | 5.7       | 5.8       | 6.2       | 7.3       |
| L-LTA   | 68.3      | 15.6      | 6.2       | 5.5       | 4.3       |
| S-fresh | 75.3      | 6.4       | 8.2       | 6.8       | 3.3       |
| S-LTA   | 62.5      | 17.5      | 8.6       | 5.8       | 5.6       |

Table S2. Surface area and pore volume of Cu-SAPO-34 with different particle sizes.

|                                           | L-fresh | L-LTA | S-fresh | S-LTA |
|-------------------------------------------|---------|-------|---------|-------|
| Area ( $\text{m}^2/\text{g}$ )            | 459.6   | 134.9 | 462.2   | 181.6 |
| pore volume<br>( $\text{cm}^3/\text{g}$ ) | 0.239   | 0.089 | 0.249   | 0.1   |

Table S3. Atomic composition of Cu-SAPO-34 with different crystallite sizes (results derived from SEM-EDS).

| Atomic/% | O    | Al   | Si  | P    | Cu  |
|----------|------|------|-----|------|-----|
| L-fresh  | 57.8 | 20.2 | 7.7 | 12.6 | 1.8 |
| L-LTA    | 63.4 | 17.4 | 7.1 | 11.2 | 0.8 |
| S-fresh  | 63.5 | 17.4 | 6.4 | 11.6 | 1.1 |
| S-LTA    | 68.6 | 15   | 6.3 | 9.5  | 0.6 |
